# Supplementary material for: Halogen bonding and triiodide asymmetry in cocrystals of triphenylmethylphosphonium triiodide with organoiodines
Source: Royal Society of Chemistry journal article supplement (doi:10.1039/c8nj01373j), 2018-01-01
Supplement: c8nj01373j1.pdf [file c8nj01373j1.pdf]

Halogen bonding and triiodide asymmetry in cocrystals of triphenylmethylphosphonium triiodide with organoiodines

Khadijatul Kobra, Shaun O'Donnell, Andrew Ferrari, Colin D. McMillen,\* William T. Pennington\*

*Department of Chemistry, Clemson University, Clemson, SC 29634-0973, USA*

### **Electronic Supplementary Information**

Figures S1-S5: Phenyl embraces.

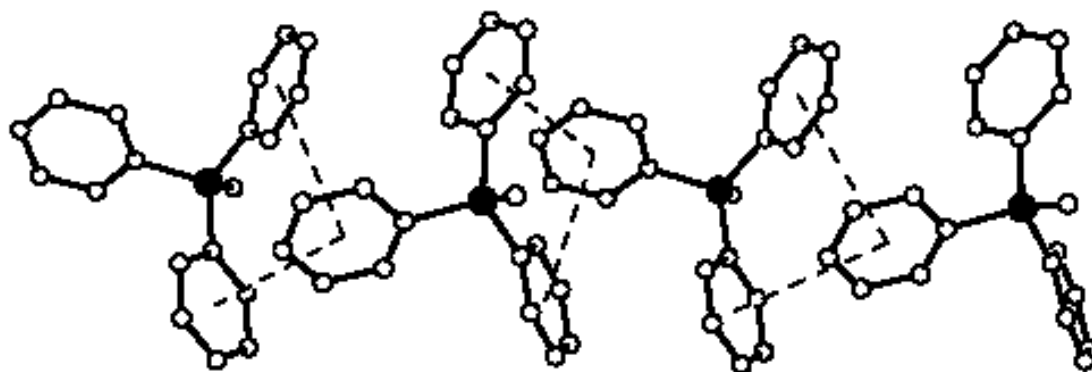

Figure S1: Phenyl embraces in  $\text{PPh}_3\text{MeI}_3 \cdot (\text{TIE})$ .

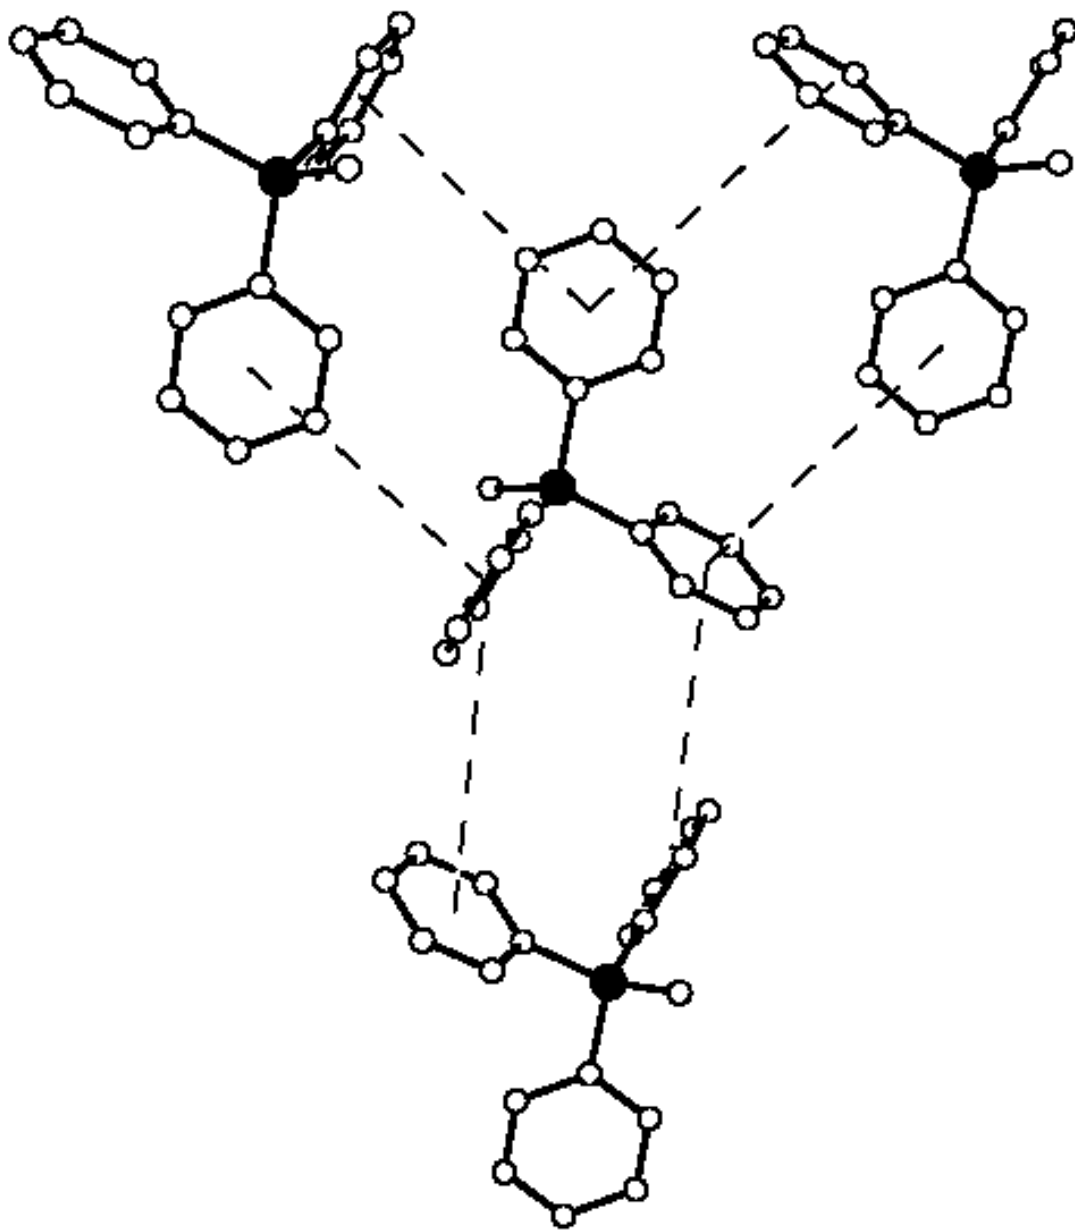

Figure S2: Phenyl embraces in  $\text{PPh}_3\text{MeI}_3 \cdot (\text{p-F}_4\text{DIB})$ .

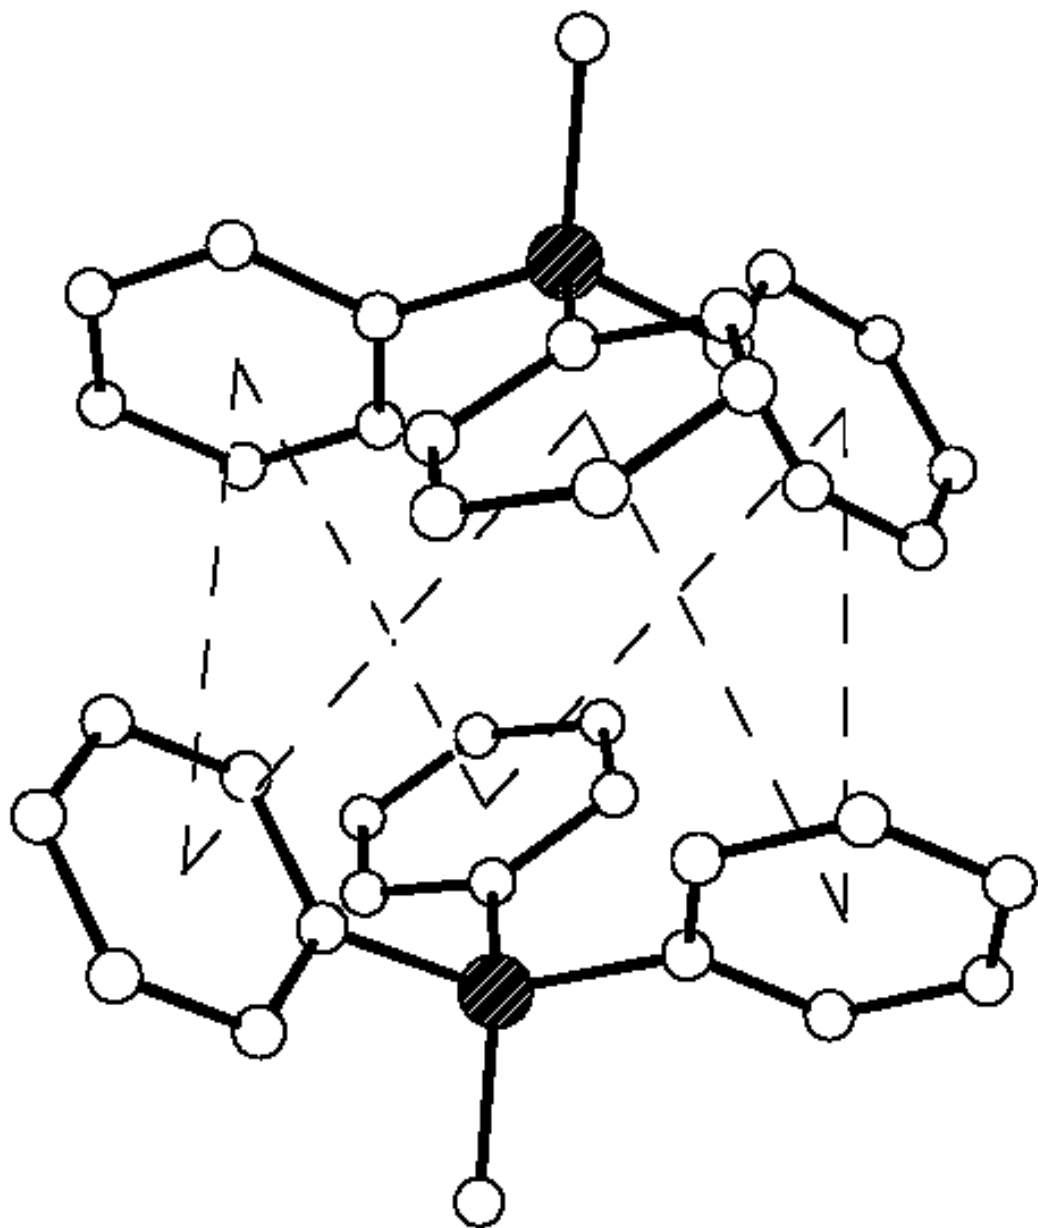

Figure S3: Phenyl embraces in 2(PPh<sub>3</sub>MeI<sub>3</sub>)·(p-F<sub>4</sub>DIB).

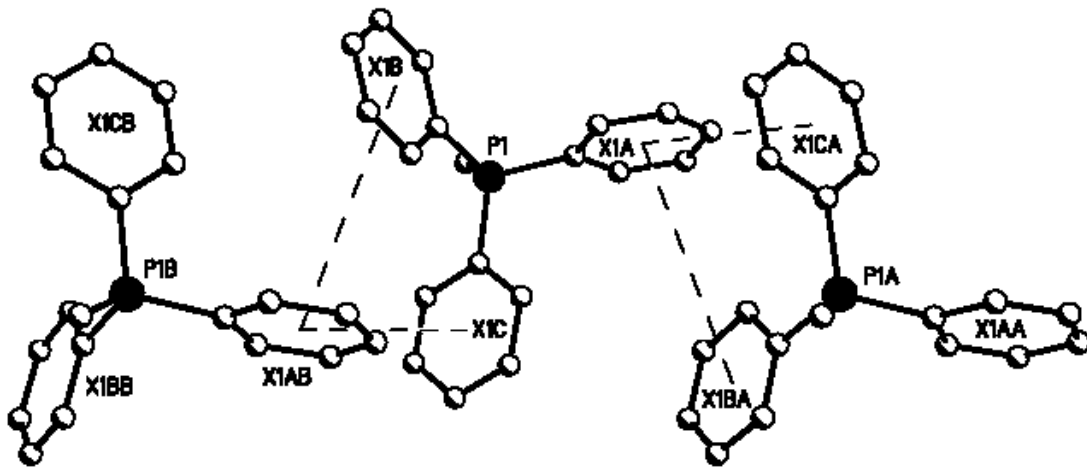

Figure S4: Phenyl embraces in  $\text{PPh}_3\text{MeI}_3 \cdot (\text{o-F}_4\text{DIB})$ .

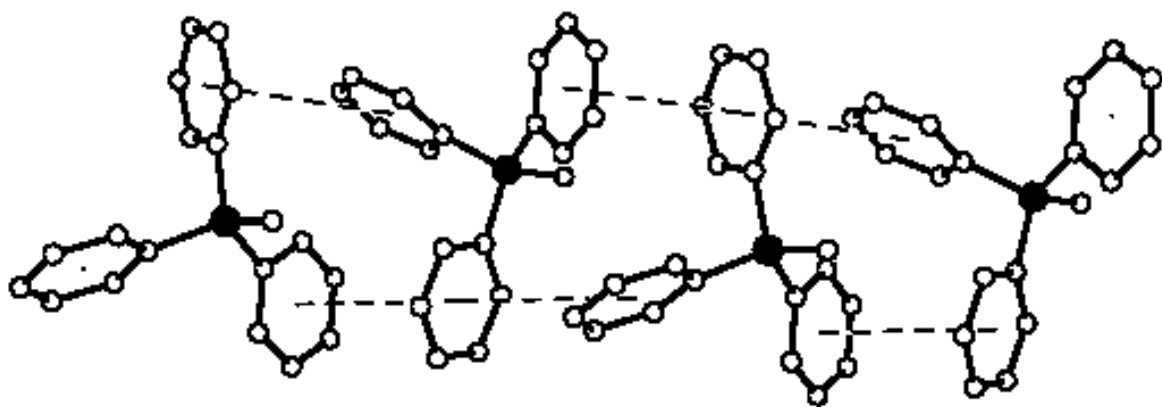

Figure S5: Phenyl embraces in  $\text{PPh}_3\text{MeI}_3 \cdot 2(\text{o-F}_4\text{DIB})$ .
